# Supplementary material for: Nuclearly translocated insulin-like growth factor 1 receptor phosphorylates histone H3 at tyrosine 41 and induces SNAI2 expression via Brg1 chromatin remodeling protein
Source: PubMed Central journal article supplement (PMC5173135; doi:10.18632/oncotarget.9785), 2016-06-02
Supplement: oncotarget-07-42288-s001.pdf [file oncotarget-07-42288-s001.pdf]

## Nuclearly translocated insulin-like growth factor 1 receptor phosphorylates histone H3 at tyrosine 41 and induces *SNAI2* expression via Brg1 chromatin remodeling protein

### SUPPLEMENTARY FIGURES AND TABLE

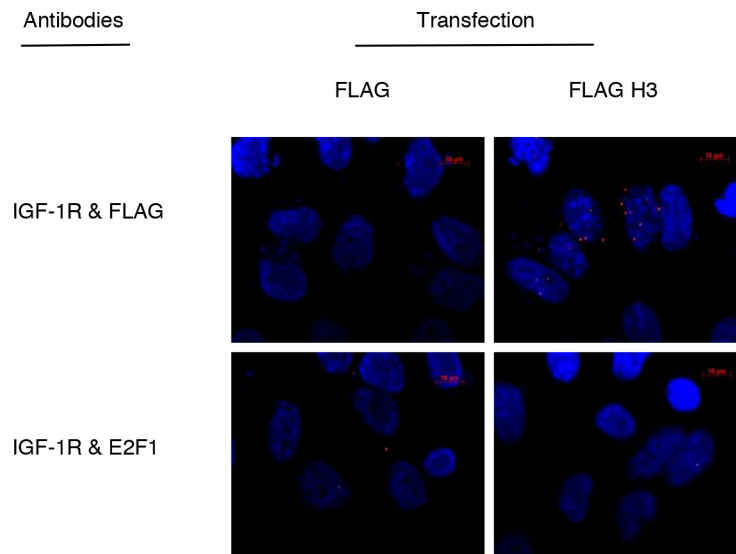

**Supplementary Figure S1: nIGF-1R binds to histone H3.** nIGF-1R and histone H3 binding determined with PLA (red dots) in HeLa cells transfected with an empty Flag vector (top left) or Flag H3 construct (top right). Anti-Flag and anti-IGF-1R antibodies were used. For negative control, PLA between IGF-1R and E2F1 did not show any signal (bottom panels). Cells were growing in basal conditions.

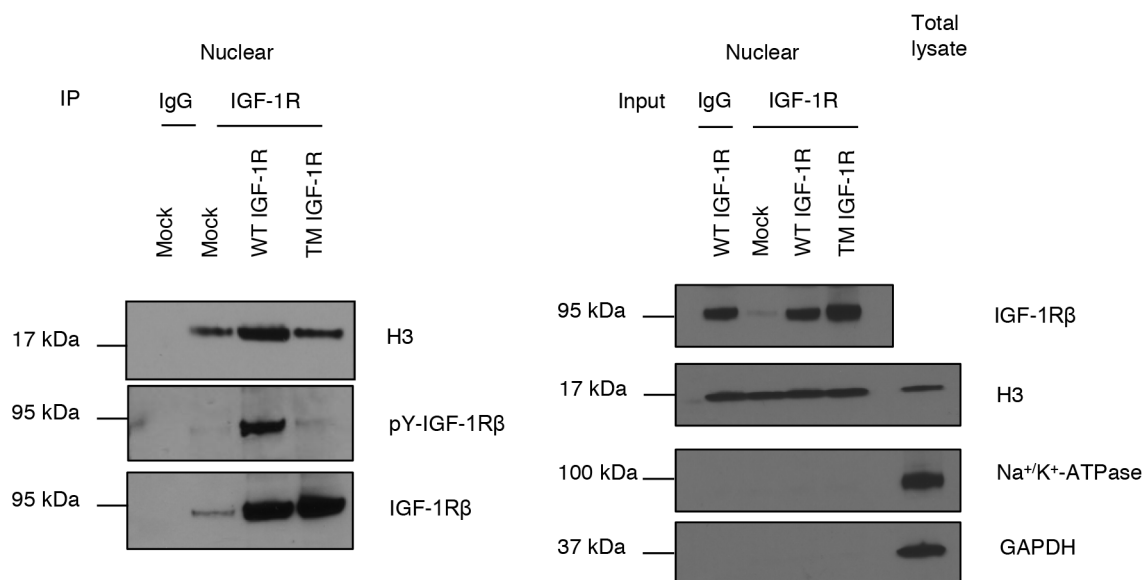

**Supplementary Figure S2: IGF-1R phosphorylation is important for its binding to histone H3.** HeLa cells cultured under basal conditions were transiently transfected with mock, *wt-IGF1R* or *tm-IGF1R* for 48 hours. Nuclear extracts were subjected to IP with IgG or IGF-1R antibodies and blotted for histone H3, phosphotyrosine-IGF-1R and IGF-1R (left panels). Right panels show purity of nuclear fractions.

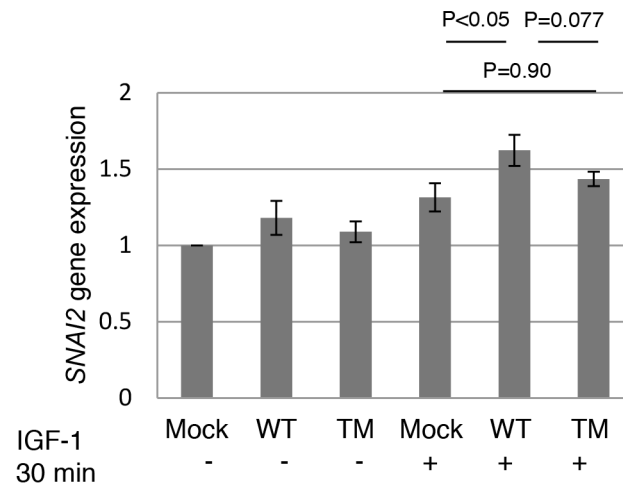

**Supplementary Figure S3: *SNAI2* gene expression by wt and tm-IGF-1R.** HeLa cells cultured under basal conditions were transfected with mock, *wt-IGF-1R* or *tm-IGF-1R* for 24 hours. After 24 hours, the cells were serum starved for an additional 24 hours. Serum starved cells were stimulated with 100 ng/ml IGF-1 for 0-30 minutes and *SNAI2* expression was analyzed with qPCR. One-way ANOVA and Tukey's HSD test were performed. P-values are indicated. Means and s.d. are shown (n=3).

Supplementary Table S1: Identification of nIGF-1R target genes by PCR array

| Gene           | <i>wt-IGF1R</i> | <i>tsm-IGF1R</i> |
|----------------|-----------------|------------------|
|                | Fold change     | Fold change      |
| <i>ARNT</i>    | -1.0754         | -1.7223          |
| <i>AURKA</i>   | -1.1051         | -1.3286          |
| <i>BIRC3</i>   | 1.2182          | -1.0754          |
| <i>BMI1</i>    | -1.0498         | -1.5638          |
| <i>CCND2</i>   | 3.3681          | 5.3244           |
| <i>DDB2</i>    | -1.4075         | -1.8561          |
| <i>DDIT3</i>   | 2.157           | 1.3646           |
| <i>DKC1</i>    | 1.2103          | -1.027           |
| <i>E2F4</i>    | -1.0373         | -1.5605          |
| <i>ERCC3</i>   | 1.0774          | -1.1268          |
| <i>ERCC5</i>   | 1.2552          | -1.2045          |
| <i>ETS2</i>    | -1.2203         | -2.0247          |
| <i>FOXC2</i>   | -1.1939         | -1.4475          |
| <i>GSC</i>     | 1.6681          | 3.0432           |
| <i>MCM2</i>    | 1.0559          | -1.3938          |
| <i>MKI67</i>   | -1.2054         | -1.7043          |
| <i>NOL3</i>    | 1.114           | -1.3191          |
| <i>PINX1</i>   | 1.1587          | -1.3956          |
| <i>POLB</i>    | 1.1331          | -1.3281          |
| <i>SKP2</i>    | 1.0207          | -1.3643          |
| <i>SNAI1</i>   | -1.0064         | -2.3167          |
| <i>SNAI2</i>   | 1.1915          | -1.1338          |
| <i>SNAI3</i>   | 1.2047          | -1.5561          |
| <i>SOX10</i>   | -1.279          | 1.565            |
| <i>TBX2</i>    | 1.4937          | -1.4026          |
| <i>TEP1</i>    | 1.2796          | -1.3499          |
| <i>TERF1</i>   | 1.6648          | -1.2004          |
| <i>TERF2IP</i> | 1.4605          | 1.1349           |
| <i>TINF2</i>   | -1.0302         | -1.3631          |
| <i>WEE1</i>    | 2.2683          | -1.3681          |

HeLa cells cultured under basal conditions were transiently transfected with mock, *wt-IGF1R* or *tsm-IGF1R* for 48 hours. RNA was extracted and converted into cDNA (see Materials & Methods). Gene expression was measured using the RT<sup>2</sup> Profiler PCR Array. The results include genes whose proteins are nuclear/nuclear-associated. Gene expression is shown as fold change compared to mock transfected cells.
